# Supplementary material for: Profiling strugglers in a graduate-entry medicine course at Nottingham: a retrospective case study
Source: PubMed Central journal article supplement (PMC3567936; doi:10.1186/1472-6920-12-124), 2012-12-18
Supplement: 1472-6920-12-124-S1.pdf [file 1472-6920-12-124-S1.pdf]

## GEM (graduate-entry medicine) Programme, University of Nottingham, UK

### Structure of programme (2003-6)

The overall structure comprised 18 months largely pre-clinical phase, followed by a 30 months full-time clinical phase. In the first phase, students take systems-based modules (6 in year 1, 3 in year 2) plus a personal & professional development module in each year. During the full-time clinical phase, students take clinical rotations in medicine & surgery plus modules in therapeutics and a community follow-up project (year 2), attachments in women's health, child health, psychiatry + health care of the elderly, ophthalmology, otorhinolaryngology, and dermatology, plus a student-selected module (year 3), and further rotations in medicine, surgery, general practice, rheumatology + neurology/rehabilitation + orthopaedics, plus a further student-selected module (year 4), concluding with an elective period and a preparation for house officer module.

|        | <b>September</b>                          | <b>December</b>             | <b>April</b>                  | <b>August</b>              |
|--------|-------------------------------------------|-----------------------------|-------------------------------|----------------------------|
| Year 1 | 1 wk Intro<br>13 weeks<br>PBL + ECE + PPD | 11 weeks<br>PBL + ECE + PPD | 12 weeks<br>PBL + ECE + PPD   |                            |
| Year 2 | 14 weeks<br>PBL + ECE + PPD               | 7 weeks<br>PBL+ECE+PPD      | 17 weeks<br>Clinical practice |                            |
| Year 3 | 10 weeks<br>Obs & Gynae                   | 10 weeks<br>Child Health    | 10 weeks<br>Psych. + HCE      | 10 weeks<br>SSM + Specials |
| Year 4 | 9 weeks<br>Senior Med.                    | 9 weeks<br>Senior Surg.     | 9 weeks<br>SSM + GP           | 9 weeks<br>MDD             |
|        |                                           |                             | 9 weeks<br>Elective           | 4 wks<br>PHO               |

PBL - problem-based learning  
ECE - early clinical experience  
PPD - personal & professional development  
MDD - musculo-skeletal disorders & disability  
Obs & gynae - obstetrics & gynaecology  
Psych - psychiatry  
SSM - special study module (choice of options)  
PHO - preparation for house officer

### Admissions criteria & process (2003-6)

The admissions process for the Nottingham GEM programme comprised:-

1. Application via UCAS (Universities and Colleges Admissions Service)
2. Eligible with 1<sup>st</sup> or 2<sup>nd</sup> (upper or lower) Class Honours degree in any subject
3. Take GAMSAT (Graduate Australian Medical Schools Aptitude Test)
4. GAMSAT cut-off score set (highest overall GAMSAT: either arithmetic mean of Sections I, II & III; or weighted mean of Section I, II, and 2\* Section III score) – ranged 59-62 for 2003-6 entry cohorts
5. Attend structured interview assessing personal qualities (e.g. empathy, integrity, insight, communication skills) – interview performance graded A (outstanding) to E (unsuitable)
6. Places offered on basis of a) interview grade, and b) GAMSAT highest mean score within each interview grade.
